# Supplementary material for: Effects of Biological Nitrogen Metabolism on Glufosinate-Susceptible and -Resistant Goosegrass (Eleusine indica L.)
Source: MDPI journal article supplement (doi:10.3390/ijms241813791), 2023-09-07
Supplement: s1 [file s1]

# Effects of biological nitrogen metabolism on glufosinate-susceptible and resistant goosegrass (*Eleusine indica* L.)

**Figure S1.** General analysis on characterizations of glufosinate-resistance goosegrass by proteomic sequencing. (a)-(h) Enrichment scatter plots of KEGG pathways in the eight comparative groups of the different goosegrass biotypes (NX, CS, and AUS) under glufosinate stress or under H<sub>2</sub>O as the controls.

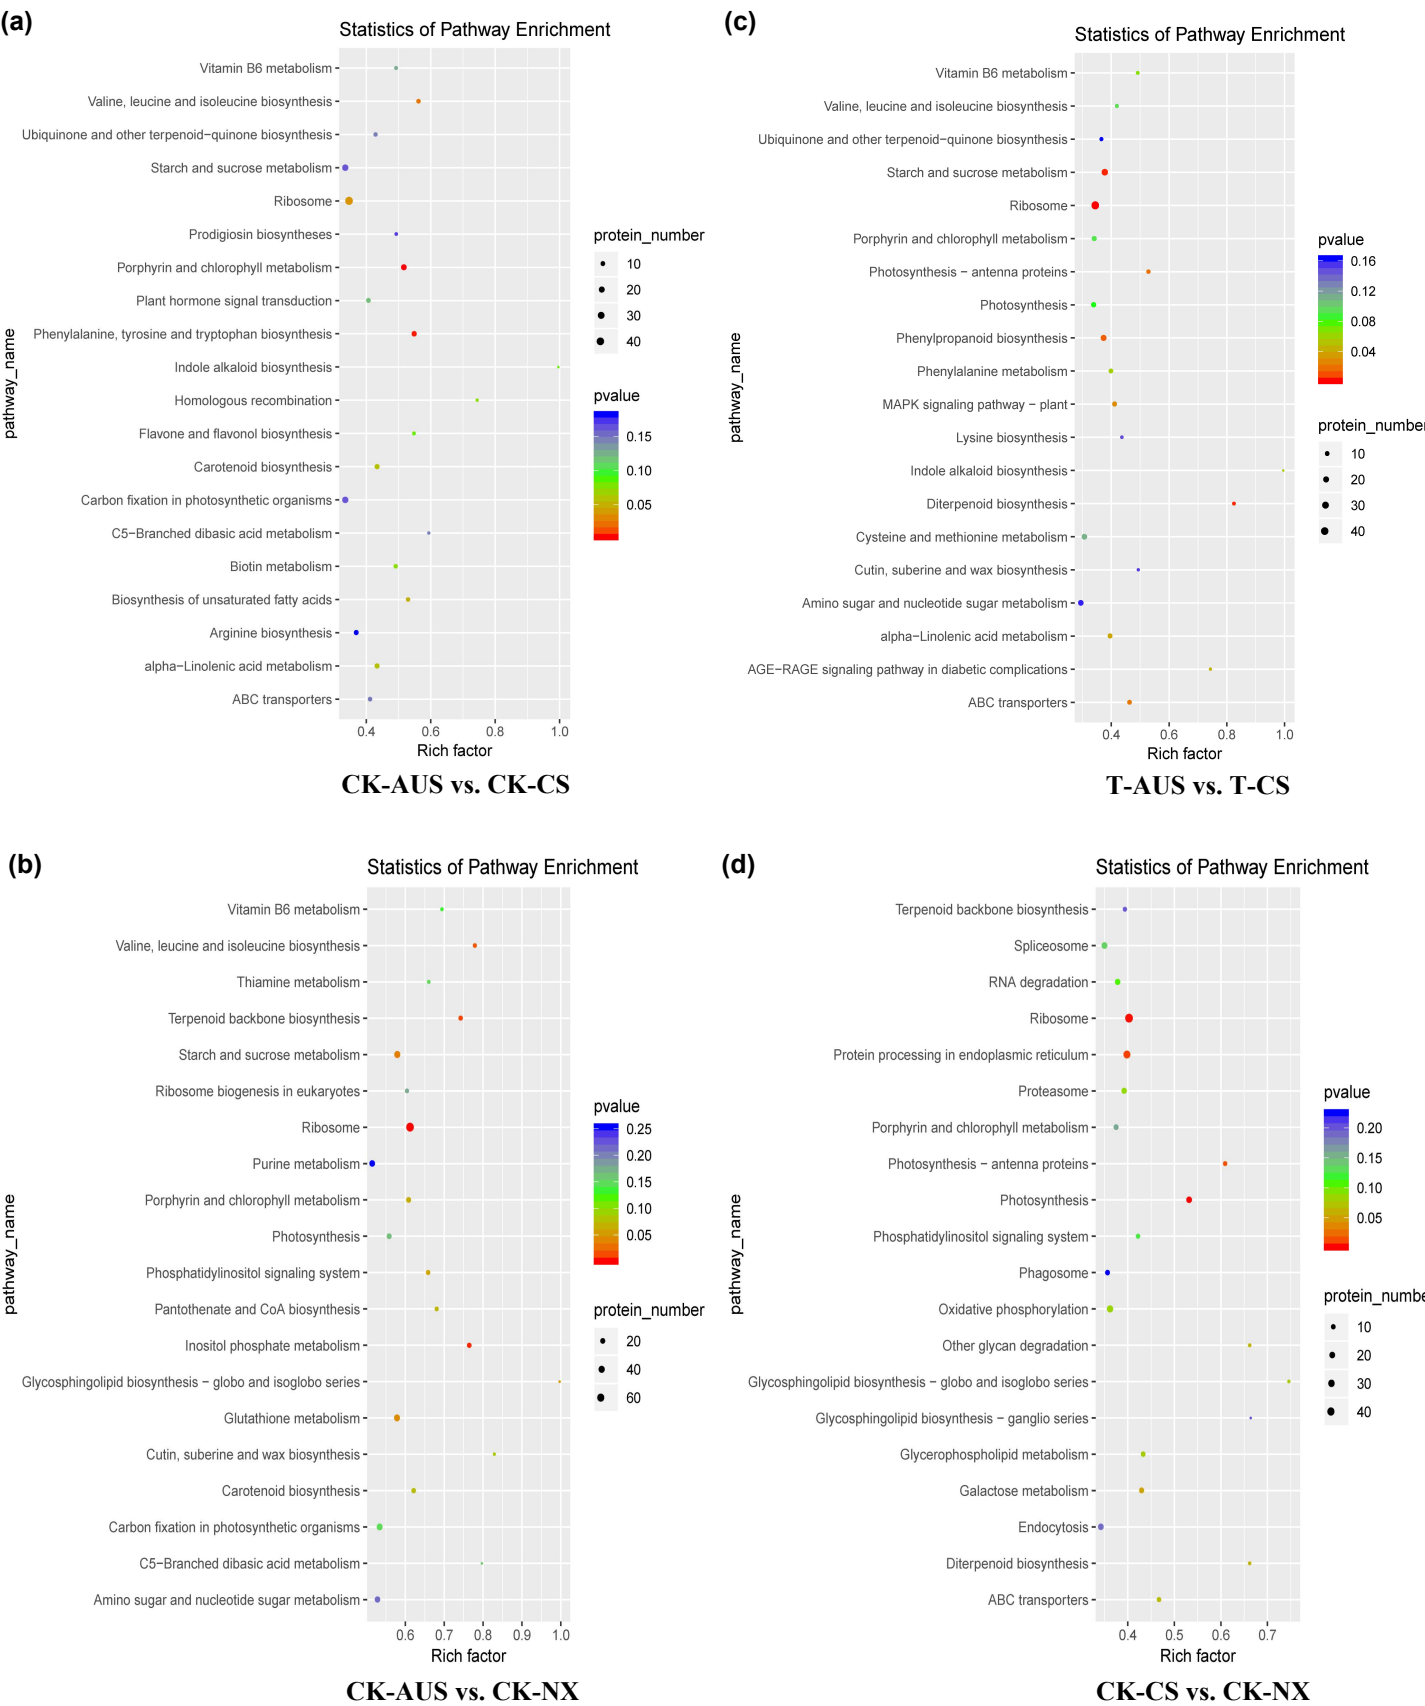

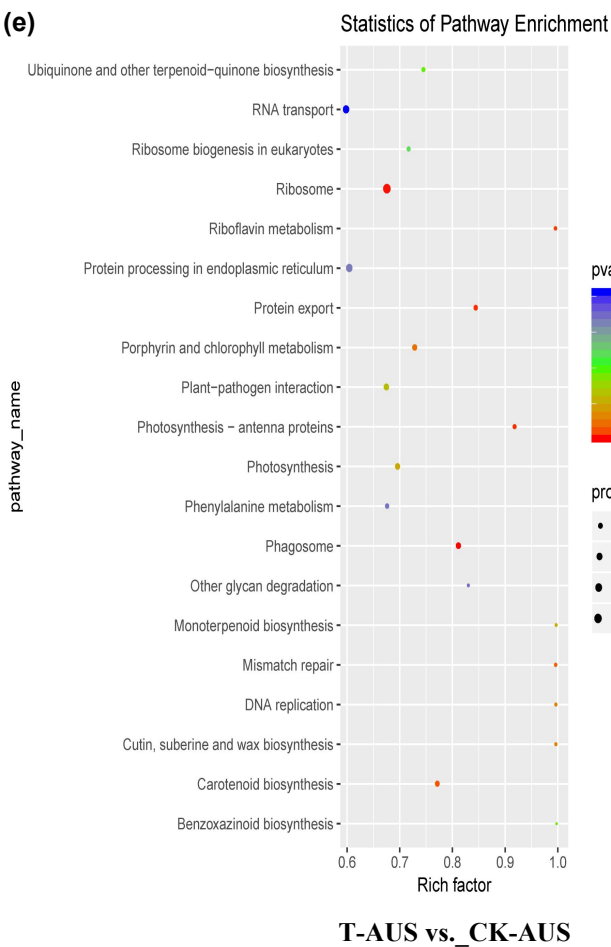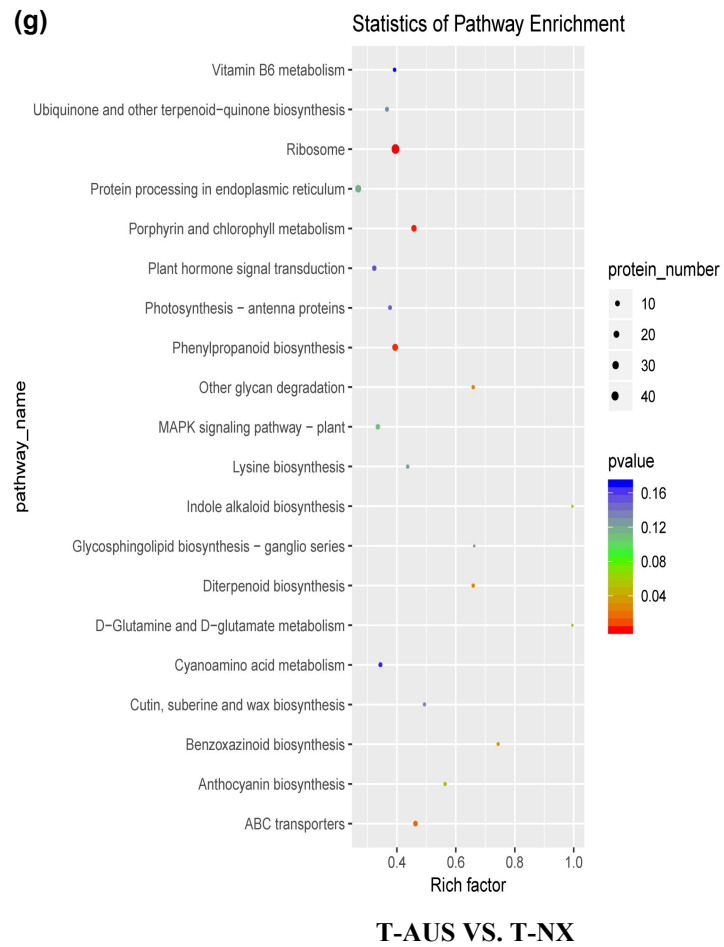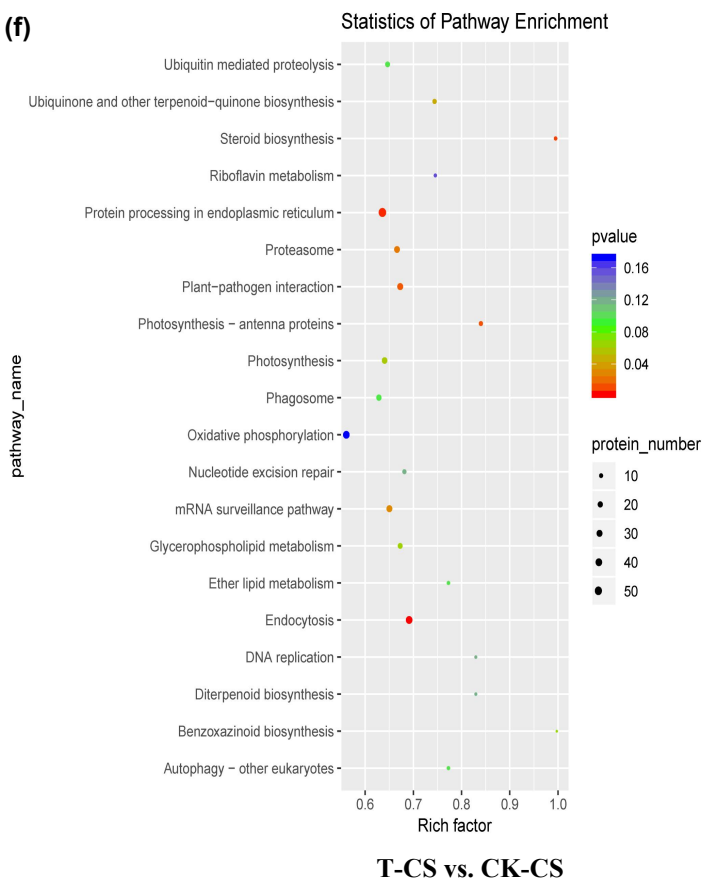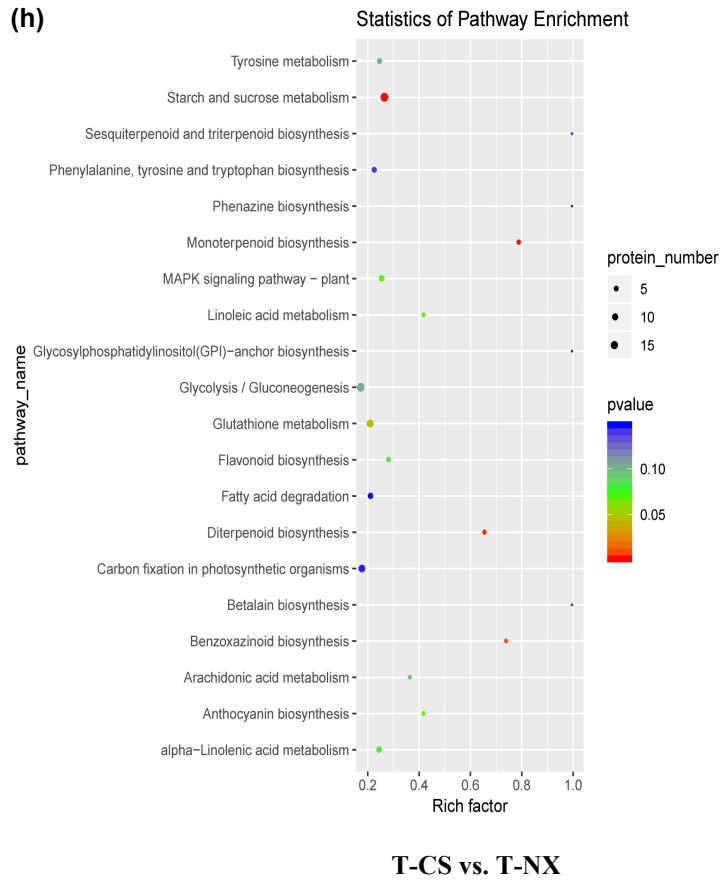

**Figure S2.** Differential expressions of genes and proteins in KEGG pathways of nitrogen metabolism. (a) and (b) Transcriptome and proteome analyses in the comparative group T-NX vs. CK-NX. (c) and (d) Transcriptome analyses in the comparative group T-AUS vs. CK-AUS and T-CS vs. CK-CS, respectively.

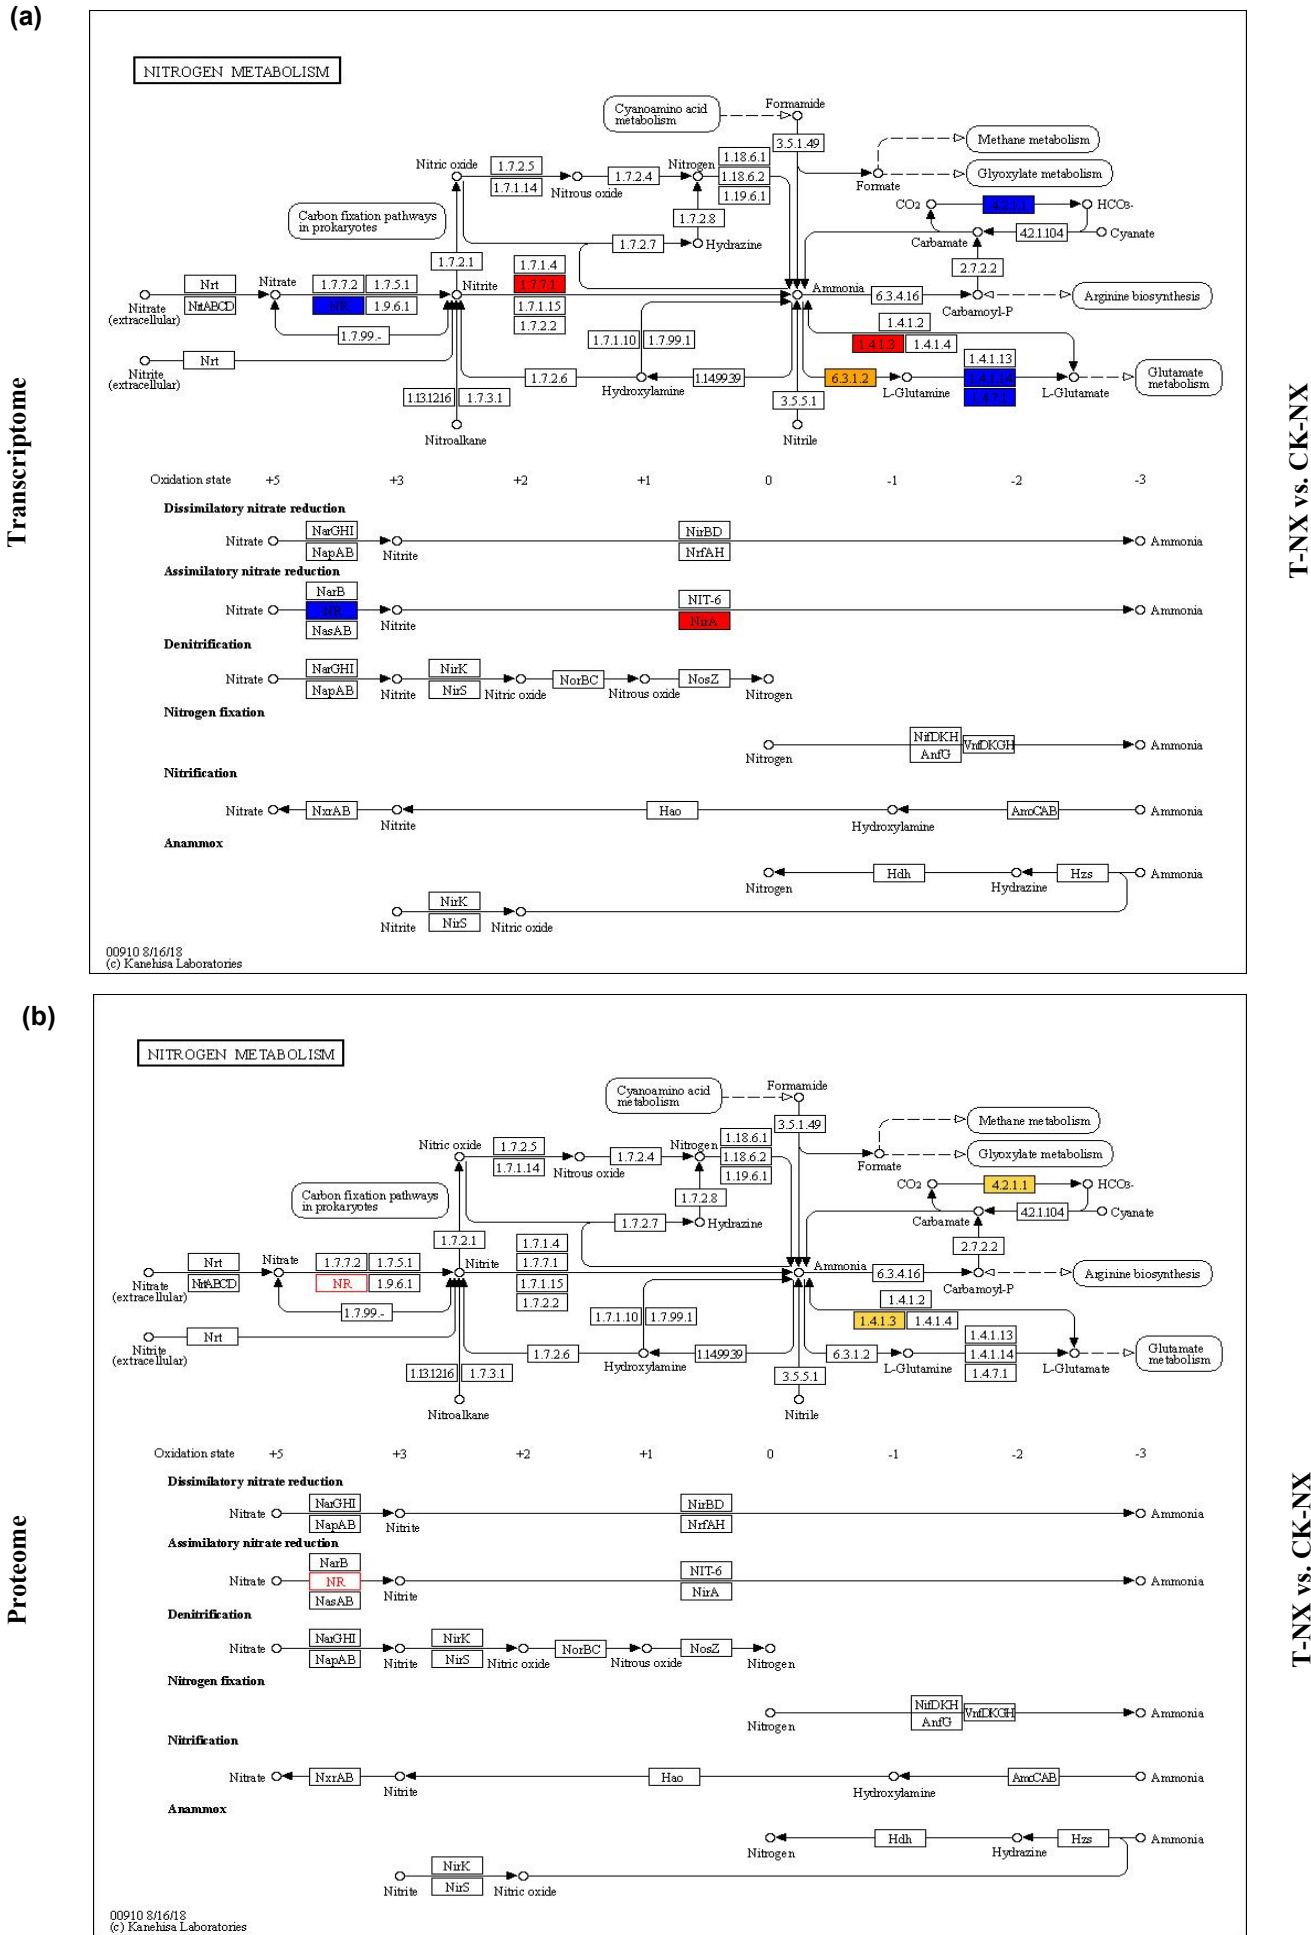

# Transcriptome

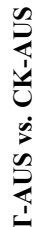

# Transcriptome

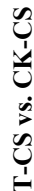

**Figure S3.** The CDS sequences of *GLNI-1*(a), *GDH2*(b), *GLSF*(c), *NIA1*(d), *Os01g0357100*(e) and *CAI*(f).

- (a) TRINITY\_DN25503\_c1\_g2 Trans\_ID=TRINITY\_DN25503\_c1\_g2\_i2 1414bp (*GLNI-1*)  
CATCTCCTTCCTCCTCCTCCATCCCAACCCGCTGCTTTGTCTGTGTACACCCAGCCGCCGCCATGGCCTGCCTCACCGACCTC  
ATCAACCTCGACCTCTCCGACTCCACCGAGAAGATCATCGCCGAGTACATATGGATCGGTGGATCTGGCATGGACCTCAGGAGCAAG  
GCGAGGACCTCCCCGGCCCGGTGAGCGATCCAGCAAGCTGCCAAGTGGAAGTACGACGGCTCCGGCACCGGCCAAGCTCCCGG  
CGAGGACAGTGAGGTATCCTATACCCACAGGCCATCTTCAAGGACCCATTAGGAAGGGCAACAACATCCTTGTATGTGCGATTGC  
TACACCCAGCTGGCGAGCCAATTCCCACCAACAAGAGGGCCAACGCTGCCAAGATCTTCAGAACCCCTGAGGTTTCTGCTGAGGAG  
CCCTGGTACGGTATTGAACAGGAATACACCCTCCTGCAGAAAGGACACCAACTGGCCTCTTGGGTGGCCTCTTGGTGGCTTCCCTGGTC  
CACAGGGTCCCTACTACTGCGGTGTTGGCGCTGACAAGTCATTGGGGCGTGACATTGTTGACTCCCACTACAAGGCTTGCTGTATGC  
CGGAATCAACATCAGTGGCATCAATGGTGAAGTCATGCCAGGACAGTGGGAGTTCGAAGTCGGCCCTGCTGTTGGAATTTCTGCTGG  
TGACCAGGTGTGGGTTGCTCGCTACATTCTTGAGAGGATCACTGAGATCGCCGGTGTCTGTTGACATTGACCCCAAGCCTATCCCT  
GGTGACTGGAACGGTGCCGGTGCTCACTCAAACCTACAGCACCAAGTCCATGAGGAACGACGGCGGCTACGAGGTGATCAAGTCCGC  
GATCGAGAAGCTCAAGCTGAGGCACCGGGAGCACATCGCCGCTACGGTGAGGGCAACGAGCGCCGGCTCACCGGCAAGCACGAG  
ACCGCTGACATCAACACCTTCAGCTGGGGCGTGGCAAACCGTGGCGCTGTGTGCTGTGGGTGCGGAGACGGAGCAGAACGGCAA  
GGGCTACTTCGAAGACCGCCGGCCGGCGTCCAACATGGACCCCTACGTGGTGACCTCCATGATCGCCGAGACCACCATCATCTGGAA  
GCCTTGATCGCGTCCACCCCTCACCAGGATTTGGCGATTGCATTGTGCCCGGGGGAAACAATTCGTCTTCTGATTACGCAAAGCATC  
TCATTGTCTCCTGTTCTGTCCATTTGGTTACACTGCTACTATTACTACAGCATTTAGTTAGGTCTGGGTATGTTTCATTTACCTCGGGG  
TGAGTGATGATCATGGTGGCAAGTGGTGTGAAGGACAAAGACATTGTTGCTTCCTTGCCGTCCGTTTGGGTGGTCTGTGTAATCCAA  
TAATGGCCGTAC
- (b) TRINITY\_DN23079\_c2\_g5 Trans\_ID=TRINITY\_DN23079\_c2\_g5\_i1 2083bp (*GDH2*)  
CGATGATGAATCAGCGGAGACTCCCTCTCCAGAAATTTCTACCGCGCTCGATCTCTTCCGTATCTGGCATTAGTGCGCGCATT  
ACGGATTCCCGTTTTAATTAATCTCTCCGCCCCGCTGGAAGACGTGCAGCGGGTTCCAATCGAGCCCGAGTCGCGCTCCAGCATTTCC  
CTACTTCTATAGCGAGCAGTTCTACCCGGCTTCAAATTCCTTCCGCTGCAACAAGAGTTCAGATCGAGAAGCCAGCGGAGCCAC  
CTCGAGTCCTTGTTCTTCTTCTACCCAGCTCGCGCATCTTATCCTCCTTCCACCTCTGGCTGGATCCCTATTAATATCACGCGCCTCAGCT  
TGCCCCAATCCATCGCTCTCGCGTGCGCTGTTTCTCGATTACGGAGAAGAAAACGCCGCTTTTCCCTTTGCCGTTTTTGCTCGC  
CCCATCTCGCTCGCTGCGTGCGCTGCGCTTGTCCCTGCCCCGTGCGCTGCGTGCTGTTCTGTCTGAAAGGCGGGTCTTTCTTCCGCC  
GCCGCCGCTCGTGATCCTTGTGCGAGCTGAGAAAGGTGCGACCATGAACGCGCTCGCCGCCACCAGCCGCAACTCCGGCAGGCGG  
CGAGGCTGCTCGGCCTCGACTCCAAGCTCGAGAAGAGCCTCCTATCCCGTTCCGTGAGATCAAGGTGGAATGCACCATCCCCAAAGA  
CGACGGCACCTTGCGCTGTTTCATCGGATTCCGCGTGACAGCATGACAATGCCCGCGGGCCGATGAAAGGCGGTATCCGCTATCACCC  
TGAGGTTGAACCTGATGAAGTAAACGCACTTGCGCAACTGATGACATGGAAGACCGCAGTTGCAGCAGTACCATATGGTGGAGCAAA  
GGGAGGGATTGGATGCTCTCCTAGTGAACCTAAGTAGAAGTGAGTTGGAGCGGTTGACACGTGTGTTACGCAGAAAAATTCATGATCT  
TATCGGTACCCATACAGATGTACCAGCTCCAGACATGGGGACAAATTCACAAACCATGGCATGGATTTTATAGTATGATTTCAAATTT  
CATGGCCATTCCCAGCAGTTGTACAGGGAAGCCAATAGATCTTGGCGGATCATTAGGCAGGGATGCTGCAACTGGACGAGGTGTG  
ATGTATGCTACAGAGGCTCTGCTGGCTGAACATGGAAAGTCCATTGCTGGATCAACTTTTGTATTAGGGGTTTGGTAATGTTGGTTC  
ATGGGCTGCACAACTTATTCATGAGAAAGGTGGTAAAATAATTGCACTTGAGATGTACTGGCTCAATCAGAAGCAAGAGTGGCAT  
AGACATACCTGCACTGATGAAGCACAGGGATGAGGGTGGTGCTTTGAAAGATTTCCATGGTGCGGAAGTTATGGATTCTTCTGAGTT  
GCTAGTGCATGAATGTGATGTTCTTATGCCGTGCGCGTTAGGTGGAGTTCTTAACAGGGAAAATGCGCCACATGTGAAGGCCAAGTTT  
ATAGTTGAAGCTGCTAACCATCCAACCTGATCCAGAGGCAGATGAGATTTTGGCAAGAATGGAGTGACAGTATTGCCAGATATCTATG  
CCAATTCTGGTGGTGTGATTGTTAGCTACTTTGAATGGGTTTCAAGAACATTCAAGGCTTCATGTGGGAAGAAGAGAAGGTGAACATGG  
AACTCCACAAGTACATGAACAACGCTTTTCATCACATCAAGGCCATGTGCAAGTCTCAAGAGTGCAACCTTAGAATGGGGGCATTCTC  
CTTAGGAGTTAATAGGGTTGCCCGTGCCACCTTGTGAGGGGCTGGGAAGCATGAGATCGTTCCATACATATAGCAGTTTCGCCGTTC  
AATAATTTTGCATTCTACATTGTTGTGGCCCATGTCTGATCTGGTAAAATTATCAGAGGTGTTTTCATGGATTGAAACCAGTTGAAAT  
AATATGCTGGATACATGGCGAATGTGTTGTGTTTGTCTTATTTCTCTGATTTCTGGGTGGCAATGTTGGTATTAGTTTTGGATGT  
CGATAATTCGATTATGGGGAACCCCGTAGTTTGTCTATGCTTCAGAGATGCC

(c) TRINITY\_DN23865\_c0\_g14 Trans\_ID=TRINITY\_DN23865\_c0\_g14\_i1 5055bp (*GLSF*)

GCCTGTGCAGGAGGCTACAGATTGAATGATATCTTATCTGAACGTGGAGCCTGCGGTGTTGTTTTGTTGCAAACCTTGAGGAATGT  
GCCTTCATTCAACATTGTTCTGTGATGCTCTTATGGCTCTTGGGTGCATGGAGCACCGTGGTGGCTGTGGAGCAGACAATGACTCTGG  
TGATGGGTGTCAGGACTGATGAGCGGTATTCCATGGGACTTGTTTGATGACTGGGCCAACAAAGCAAGGACTTGCTCCCTTTGACAGAAG  
AAATACAGGTGTAGGCATGGTTTTCTTCCAAAAGATGAGAAGTCCATGGCAGAAGCCAAAGCCGTAACAGAAAAGGTTTTTAAGG  
ATGAAGGCCCTTGAGGTTCTTGGATGGAGAGGTGTTCTTTTAAATGTAGCAGTGGTAGGTCGCAATGCAAAAGAGACCATGCCTAATA  
TTGAACAAGTATTTGTAAAAGTTGCAAAAAGATAATGCTGATGACATAGAGAGGGAATTGTACATCTCCCGGAAGCTGATAGAG  
CGGGCTGCAAAATCTGAAAGTTGGTCAGATGAACTTATTTTTGCTCTTTGTCAAGCAGAACCATTGTCTACAAGGGAATGCTCCGAT  
CTGAGGTTCTTGGGCAATTTTATTTGGACCTTCAGAATGAACGTACAAATCTCCTTTTGCCATATATCATCGAAGATACAGTACAAAT  
ACAAATCCTAGATGGCCTCTTGCTCAACCTATGAGGTTGCTTGGACACAATGGAGAAATTAACACAATACAGGGGAACCTTGAACCTGG  
ATGCGATCGAGGGAAGCCACACTACAATCTCCAGTATGGCGGGGCCGTGAGCCTGAAATACGTCCGTTTGGTGACCCTAAAGCATCT  
GATTCAGCAAATCTTGACAGCACCGCTGAATTACTGCTAAGGAGTGGTAGAAGTCCCGCTGAAGCTCTTATGATTCTCGTTCCTGAGG  
CATATAAGAACCATCTACATTATCAATAAAATATCCTGAGGCAGTTGACTTTTATGACTACTACAAAGGCCAAATGGAGGCTTGGGA  
TGGACCTGCTTTACTATTATTCAGTGATGGAAAGACAGTAGGAGCAACTCTTGATAGAAATGGGCTCCGTCCAGCACGCTATTGGAG  
AACATCAGATGATTTTGTATGTTGCATCTGAGGTTGGTGTATACCAATGGATGAGTCAAAGGTAGTAATGAAAGGAAGATTAGG  
ACCTGGAATGATGATAACTGCTGACCTAGAGACTGGACAGGTGCTTGA AACACAGAGGTGAAGAAAAATGTGGCTTCTGCATACC  
CCTATGGAACCTGGTTGCAGGAACGTACACGCTATATAAACCTGTCAACTTCTCTTCAACCATCATGGACAATGAGACGGTTTT  
GAGACATCAACAGGCATTTGGCTATTCTAGTGAAGATGTGCAATTGGTAATTGAATCAATGGCTTCACAAGGAAAGGAACCAACATT  
TTGCATGGGCGATGACATTCCATTAGCCGTGTTGTCACAAAAGCCGACCTGTTATATGATTATTTCAAGCAGCGGTTTGCACAGGTA  
ACAAATCCTGCCATTGATCCGCTCAGAGAAGGTTTAGTTATGTCTCTCGAAGTTAATATCGTAAAAGAGGCAACATCTTGGAGGTT  
GGGCCTGAAAATGCTGATCAGGTTGCTCTATCAAGTCTGTGCTGAATGAAGGTGAAC TAGAATCGCTATTGAAGGACCCGACACTG  
AAGCCCAAAGTACTCTCAACGTACTTTGATATTCGTAAGGTCTAGATGGTTCTCTTGACAAGACAATTAAGGCTCTTTGTGAAGAAG  
CTGATGCTGCTGTGCGGAGTGGTTCTCAACTTCTGTGCTTTCTGATCGTTCTGAAGAACCTGAACCAACTCGCCTGCCATACCAAT  
ACTTCTAGCTGTTGGTGCCATCCACCAGCATTTGATTGAGAATGGCCTTAGAATGTGCGGCTCTATTGTTGCTGATACTGCTCAGTGTT  
TCAGCACCCATCACTTCGCCTGTTTGATTGGATATGGAGCCAGTGCTGTGTGTCCTTATCTGGCACTGGAGACATGCCGGCAATGGA  
GGCTGAGTAACAAAACAGTTAATTTGATGCGAAATGGGAAAATGCCACTGTGACCATCGAGCAGGCTCAAAGAACTTTATCAAG  
GCAGTGAAATCTGGTCTGCTCAAGATACTTTCAAAAATGGGCATCTCACTGCTCTCAAGTACTGTGGAGCTCAGATCTTTGAAATTT  
ATGGCCTTGGTCAAGAAGTTGTTGATCTTGCCTTCTGTGGAAGTGTATCCAAAATGGAGGGCTCACACTGGACGAGCTGGGGAGA  
GAACTTTGTCACTTCTGGGTGAAGGCATTCTCAGAAGATACTGCAAAGAGGCTAGAGAACTTTGGATTCAATCCAGACCTGGA  
GGTGAATACCACGCAAATAATCCTGAGATGTCAAAGCTGCTGCACAAAGCAATTCGCGAAAAAGAGATAACGCATATACCGTCTAC  
CAACAACACCTTGCAAGTCGTCCTGTCAATGTTCTCGAGATCTTCTGAATTGAAGAGTGATCGTGCACCTATTCTATTGGCAAAGT  
TGAGCCTGCAACCTCCATTGTTGAGCGTTTTTGTACAGGTGGAATGTCCCTAGGAGCCATTTCAAGAGAAACACATGAAGCTATTGCA  
ATCGCAATGAATAGAATAGGCGGTAATCTAACTCGGGAGAAGGTGGTGAGGACCCGATCCGTTGGAATCCCCTACAGATGTTGT  
AGATGGGTATTCTCAACACTTCTCATCTCAAAGGTCTTCAGAATGGTGACACTGCCACAAGCGCCATTAAGCAGGTTGCATCTGGG  
CGTTTTGGAGTTACACCAACCTTTTTAGTAAATGCTCAACAAATTGAGATAAAGATTGCACAAGGTGCAAAGCCTGGTGAAGGGGGT  
CAACTTCTGGGAAAAAAGTCAGTGCATATATTGCTAGGCTGAGGAACTCCAAACCTGGAGTTCCTCTCATATCCCCACCCCCACACC  
ATGACATCTATTCTATTGAGGATCTTGACAGTTAATTTATGACCTTCATCAGATCAATCCTAAAGCCAAGGTCTCCGTAAGCTTGTA  
GCTGAAGCTGGGATTGGAACGTGAGCTTCTGGAGTTTCAAGGGAAATGCAGATATTATTCAGATATCAGGCCATGATGGTGGTACA  
GGAGCTAGCCCAATCAGCTCAATCAAGCATGCTGGGGTCTTGGGAACTTGGTCTTACAGAAACGAATCAGACACTTATACAAAT  
GGATTGAGAGAGAGGGTGGTACTTAGGGTGGATGGTGGATTGAGGAGTGGCCAGGATGTTCTTATGGCTGCTGCCATGGGCGCTG  
ACGAATATGGTTTTGTTCTGTAGCTATGATAGCCACAGGATGTGTCATGGCACGCATTTGCCACACAAAATAATTGCCAGTTGGAGT  
TGCTAGTCAGAGAGAAGAGCTTCGTGCCAGTTTCTGGTGTCCCGTGATCTTGTTAACTATTTCTCTTTGTTGCAGAGGAGGTA  
CGGGCTGCATTAGCCCAACTGGGTTTCGAGAAGCTGGATGATATAATTGGGCGTACAGATTTGCTTAAGCCGAAGCATGTCTCTTG  
GTGAAAACACAGCACATTAACCTTGGATACTCTTAGAAAAATGCTGGATTACCCAAATGGAGCAGCTCACAGATTAGGAGCCAGGAC  
GTCCACACTAATGGCCTGTGCTTGATGAGACAATCCTTGCAGATCCTGAGATAGCTGATGCTATAGAGAATGAGAAAAGAGGTTTCA  
AAGACATTTCAAATTCATAATGTTGATAGAGCTGTGTGTGGCCGAGTAGCGGGTGTGATTGCCAAGAAGTATGGAGACAGAGGTTT  
TGCAGGGCAGCTTAACGTACGTTCACTGGAAGTGCAGGACAGTCTTTGGTTGTTTCTTGACTCCAGGAATGAATGTTCCGGCTAGT  
TGGAGAGGCCAATGATTATGTCGGAAGGGTATGGCTGGTGGAGAACTAGTAGTAGTTCTGTAGAAAATACAGGATTTGTTCTCTG  
AGGATGCTACTATAGTTGAAAACACTTGTCTGTATGGAGCCACAGGTGGTCAAGTATTTGTGAGAGGCAAGGCAGGAGAAAGATTT  
GCAGTTAGAAACTCTAGGTGAGGCAGTGGTTGAGGGCACTGGAGATCACTGCTGCGAGTACATGACTGGTGGCTGTGTAGTTGT  
ACTTGGCAAAGTGGGAAGGAATGTTGCTGCTGGAATGACTGGTGGCCTTGCTTACATTCTAGATGAGGATGATACACTCACACCAA  
GGTCAACAAGGAAATTGTCAAGATGCAGAGAGTGAATGCTCCAGCTGGGCAGATGCAGCTGAAGAGTTTGATTGAGGCTTACGTTG  
AAAAACGGGCAGTGAGAAAGGTGCCACGATTTTGAGGGAATGGGAGGCATATTTGCCACTCTTGGCAACTGGTACCGCCAGC  
GAAGAAGACTCACCTGAGGCCTGTGCCGAGTTTGAGAGAGTACTCGCTAAGCAAGCAACCAACCCAGCTATCTGCGAAGTGATCAAA  
TCAGGCAACAGGAAGGTGTGCTCTTTCTGACACTCACATAGTGATTTCCGCTGACCGCTTCAAGAAAAAAGTAACCGGCATACTTCTG  
AAGCACCGAAGTGCCGATGGCTGCAATTTTTTTTGTGGAGGCTCTGCTCAAGTCATCTTTTGGAGGCTCTGAGCTCGCAGAACCAT  
CGTGGATTCTCTGACGCCCTTGATCCTAGGTAACCCCTGTAAATTGGTTAACTGGCGCCAGGTTGCAAGGGCGCTCTTTGGAAC  
TGTTGCATTCTGTACATGATTCTTAGCTCTGTCCCGTGAATTATGTTTTGGTGAGCTGTTAAATTTATACGGATCCAGTGGAGGCA  
TGCAAGCGGCATGAGCATGTGGTACTGTACATAATAAGTTGTACGGTTCAGCAGGGTATCTCAGTCTGCTTTCATGAATGAACG

(d) TRINITY\_DN24663\_c0\_g1 Trans\_ID=TRINITY\_DN24663\_c0\_g1\_i1 3174bp (*NAI*)

CAGCTAGCGCCTCTTCACAAGCATCTCACAGAAAGCAGAGAGATCGGACCTCTAGCACTACACACGCCAGGTCTCCCTGACATGGCCG  
CTTCTGTGCGAGCCACGGCAGTTCGGCCGCCTCGAGCCTGGTTCGGGGCAGGTCCGCGTGGCCACGAACGGCGCCAAGGCGTACCCTCC  
CCCGGCGAGCCACATCCCCCGCCGCTCCGACTCGCCCGTGC GCGGCTGCGGCTTCCCTCCGCTCGTTTCCCCGCCGCGGAAATCCGATG  
ACGCTTCGGACGACGACGACGACGAGCCGGAGGACTGGCGCGAGCTGTACGGCTCGCACTCCAGCTGGAGGTTGAGCCGGCGGTG  
CACGACCCGCGCGACGAGGGCACTGCCGACGCGTGGATCGAGCGCAACCCGTCGCTCATCCGGCTGACGGGGAAGCACCCGCTCAAC  
TGCGAGCCGCCGCTGGCGCGGCTGATGCACCACGCTTCATACCCCGGCGCGGCTGCACTACGTGCGCAACCACGGCGTGGTCCCCA  
GGGGCGAGTGGGGCAGCTGGGGCGTGGAGGTGACGGGCCTCGTGAAGCGGCCCGCGCGGCTGAGCATGGACGAGCTGGTCCGCGA  
CTTCCCCGCCGCTGGAGGTGCCCCTGACGCTGGCGTGC GCGGGCAACCGGCGCAAGGAGCAGAACATGGTGCAGCAGACGGTGGGGT  
TCAACTGGGGCGCCGCGGGCGTGTCCACCTCCGTGTGGCGCGGCGCCAGGCTCCGCGACGTGCTGCGCCGATGCGGCATCATGCCGC  
GCAAGGGAGGCGCGCTCAACGTGTGCTTCGAGGGCGCAGAGGACCTGCCCGGCGGCGGAGGGTCCAAGTACGGGACCAGCGTCACC  
AGGGAGTGGGGCGCTCGACCCGTCCAGGGACATCATGCTCGCCTACATGCAGAACGGGGAGCCGCTGCTGCCCGACCACGGGTTCCCG  
GTTCTGTGTCATCATCCCCGGATGCATCGGCGGGCGCATGGTCAAGTGGCTCAAGCGCATCATCGTCACACCCGCGGAGTCGGACA  
ACTACCATTACAAGGACAACCGGGTCTTGCCGTCCCATGTTGACGCCGAGCTCGCCAACGCAGAAGCGTGGTGGTACAAGCCGGAGTA  
CATGATCAACGAGCTCAACATCAACTCGGTGATCACACGCCGGGCCACGACGAGATCTGCCATCAACGCCGTCAACACGCAGCGC  
GGCTACACCATGAAAGGATACGCCTACTCCGGCGGTGGCAAGAAGGTGACAAGGGTGGAGGTGACGCTCGACGGCGGCGAGACATG  
GCTGGTGTGCGCGCTCGACCACCCGGAGAAGCCGAACAAGTACGGCAAGTACTGGTGTGGTGTCTTGGTCCGTGAGGTGAGGT  
CCTGGACCTCCTGGGCGCCAAGGAGATCGCCGTCCGCGCCTGGGACCAGTCTGCTCAACACCCAGCCCCGAGAAGCTCATCTGGAACCTC  
ATGGGTATGATGAACAACCTGCTGGTTCAAGGTGAAGGTGAACGTGTGCCGTCCGCACAAGGGCGAGATCGGTCTGGTGTTCGAGCAC  
CCGACGCAACCGGGCAACCAAGGCCGGCGGATGGATGGCGCGGCAGAAAGCAGATGGAGACGGCGGAGGCGGCGCGCGGGTCTCA  
AGCGCAGCACGTCCACGCCCTTCTCAACACGGCCGGGGACGCCAAGCAGTTACCATGTGCGAGGTGCGCAAGCACGCGTTCGAGG  
AGTCGGCGTGGATCGTCGTGCACGGCCACGTCTACGACTGCACCAAGTTCTCAAGGACCACCCGGGCGGCGCCGACAGCATCTCAT  
CAACGCCGGCACCGACTGCACGGAGGAGTTCGACGCCATCCACAGCGACAAGGCCAAGGCGCTGCTCGACACGTACCGCATCGGGGA  
GCTCATCACACGGGACCGGCTACACCTCCGACAACCTCCGTGCACGGCGGGTCCGTGCTCTCCACCTGGCCCCCATCCGGGAGGCCA  
TCCGTGCACCGGCGCCCGTGGCGCTCTCAACCCGCGCGACAAGATCCGGTGCCGCCTCGTCGACAAGAAGACCCTGTACGCGACGT  
GCGCCTGTTCCGCTTCGCTCTGCCGTGGCGGACCAGGTGCTCGGCCTCCCCATCGGGAAGCACATCTTCGTGTGCGCCGCCATCGACG  
GGAAGCTCTGCATGCGCGCGTACACGCCGACGAGCATGGTGGACGAGATCGGCCACTTCGACCTGCTCGTCAAGGTCTACTTCAAGAA  
CGAGCACCCGAAATTCCCCAACGGCGGGCTCATGACGCAGTACCTGGAGTCGCTGCCCGTGGGTCTACATCGACGTGAAGGGCCCC  
CTCGGCCACGTGAGTACACCGCCGCGGCAACTTCGTATCAACGGCAAGCAGCGCCACGCGCGCCGCTCGCCATGATCGCCGGGG  
GGAGCGGGATCACGCCATGTACCAGGTATCCAGGCCGTGCTGCGCGACCAGCCGGAGGACACCACGGAGATGCACCTCGTGTACG  
CCAACCGGACGGAGGACGACATCTCTCCGCGACGAGCTGGACCGGTGGGCCAAGGAGTACCCGGACAGGCTCAAGGTCTGGTACG  
TGATCGACCAGGTGAAGCGGCCCCGAGGACGGGTGGAAGTACAGCGTCGGCTTCGTACGAGGCCATCCTCAGGGAGAACGTCCCCG  
AGGGCGGAGACGACACGCTGGCACTCGCATGCGGGGCCGCCCATGATCCAGTTCCGCATCAAGCCCAACCTGGAGAAGCTCAAGT  
ACGACTTGAAAAGTTCTTCATCGCCTTCTAAGTTCTAAGTAAGAACCATTAAATTACCACGCACTTTAGATTTGTATGTATATAGGTGTG  
TGTCAAAACAGTCGAATTGCCTATGCCATCGTTACATGAGATGGGTATTATATATACCGGAGGAAGGTTTGTAAAGGTGTACAATTGT  
ACTTTTGCTCTAGTCTTAGAGACTAGAACACGTACATAGGGGGTCAATTTTGCATGCCCTCAGAATGTCAAGTTCTGACTTCTGAGGA  
GGCTGCTTCTTTGCTCTTACTGTATACTGCTAGCAGGTAACCATTTGTTTACCTTGGGACCGGGATGTCAGAATATGTAAGCTTAAT  
TGTTTGAATGAATGAAGAA

(e) TRINITY\_DN20338\_c0\_g2 Trans\_ID=TRINITY\_DN20338\_c0\_g2\_i1 2060bp (*Os01g0357100*)  
CAACCACACGCTGGACACCCATGGCCACCGTCACAGCACAGCAGCAGCAGAACCGTAGCTACCACAGCCAGCAGCCATGGCCTCCTCC  
GCATCCCTGCAGCGTTTCTCTCCCGCCCTCCCCGCACGCGGGCGGGCTCGTCTCGCCGGCGCCCGGCCGCGCCCGCCCGTGCAGTGCCA  
GGCCGTCAACACCTCGTCGTCGCCCTCGCCGCCGGCCGTCTCGGAGGAGCGGGTGGAGCGGAGGGTGGAGCAGCGGGAGGGCGGGT  
ACTGGGTGCTCAAGGAGAAGTTCGGACGGGGCTGAACCCGAGGAGAAGGTGAAGCTGGAGAAGGAGCCCATGGGGTGTTCATG  
GAGGACGGCATCAAGGAGCTCGCCAAGGTGCCCATGGAGGAGATCGACGCCAACAAAGCTCTCAAGGACGACGTCGACGTCGCCCTC  
AAGTGGCTCGGGCTCTTTCACCGCCGCAAGCACCAGTACGGCCGCTTCATGATGCGTCTGAAGCTGCCGAACGGCGTGACGACGAGCG  
AGCAGACGCGGTACCTTGCGAGCGTGATCGACGCGTACGGCGAGAACGGGTGCGCCGACGTGACCACCCGGCAGAACTGGCAGATCC  
GCGGCGTCACGCTCCCCGACGTGCCGGCCATCCTCGATGGGTCTCGCGCCGTGCGGGCTACCCAGCCTGCAGAGCGGCATGGACAACGT  
GCGCAACCCGGTGGGCAACCCGCTCGCCGGCATCGACCCGACGAGATCGTCGACACGCGCCCTTACACCAACCTGCTCTCCTCTACA  
TCACCAACAACCTCACAGGGGAACCCGAGTTCACCAACCTGCCGAGGAAATGGAACGTCTGTGTGGTGGGCACGCACGACCTGTACG  
AGCACCCGCACATCAACGACCTGGCTACATGCCGGCCGTCAAGGACGGCAGGTTGGGTTCAACCTGCTGGTGGGCGGGTTCATCAG  
CCCCAAGAGGTGGGGCGAGGCTCTGCCGCTCGACGCTGGGTCCCCGGCGACGACATCCTCCCGTGTGCGGGGCCATTCTCGAGGC  
GTTTCAGGGACCTCGGCAACAGGGGCAACCGCCAGAAGACGCGCATGATGTGGCTCATCGATGAACCTCGGGATGGAAGTGTCCGGTC  
GGAGGTGGAGAAGCGGATGCCGAACGGGGTGTGGACCGCGCCGCGCCGGAGGACCTGATCGACAACACCTGGCAGCGGCGCGACT  
ACCTGGGCGTGACCCCGCAGAAGCAGGAAGGCCTGTCTGACGTGGGCCTGCACGTGCCCGTGGGCGGTGTGCAGGCTCCGACATGT  
TCGACCTCGCGCGCTCGCCGACGAGTACGGCTCCGGCGAGCTCCGGCTCACGGTGGAGCAGAACATCGTGCTCCCAACGTGAAGAA  
CGAGCGGCTCGACGCGCTGCTCGCGGAGCCGCTGCTGCAGAAGCTCTCCCCGAGCCGTGCTGCTGCTCAAGGGCCTCGTGGCGTGC  
ACGGGCAACCAAGTTCTGCGGCCAGGCCATCATCGAGACCAAGATGCGCGCGCTCAACGTGACGCAGGAGGTGGAGAAGCGCGTCTCG  
GTGCCACGGCCCGTGCATGCACTGGACGGGTGCCCCAACAGCTGCGGCCAGGTGCAGGTGCGCGACATCGGCTTCATGGGGTGC  
CTCACCAAGGACAGCAACGGCAAGATCGTCGAGGCGGCGGATATCTTCTGTCGGCGGCCGCGTGGCAGCGACTCGCATCTCGCGGAC  
GTGTACAAGAAGTCCGTGCCGTGCGACGAGCTTGCGCCATCGTGGCTGACCTCCTCGTTGAGAAATTTGGGGCGGTGCCGAGGGAGA  
GGGAGGAGGATGAGGAGTAGGAACACCTACTGCGGCTGTTCCGCTGATCTTCTGTTGAGTACTCCGAGTTGAGTTACCGACCGT  
TTGTTGTAAGTAGATGATGCCCTCTTCCCTGGCACGGCTAAATGTTCCACGATTGTTTTGATGTGTAGTCCACAGTTTTCCAGTTCACA  
CGTTACAGTGAATGCTGATAAATAAAGTAACACGCTGCAATACAGG

(f) TRINITY\_DN22941\_c0\_g1 Trans\_ID=TRINITY\_DN22941\_c0\_g1\_i5 932bp (*CAI*)  
GTTTCGAGGACTTCAAGGTCAATGTATACAACAAGAAGCCGGAGCTGTTTCGAGCCGCTCAAGGAGGGCCAGGCACCTACGTACATGGT  
GTTTGGCTGCGCCGACTCCCGATGCTGCCCTTCAGTGACCTCGGCTGCAGCCGGGCGAGGCCTTACCATGCGCAACATTGCCAGC  
ATGGTTCGGTCCCTATGACAAGAACAAGTATACTGGCACCGGGTCCGCCATCGAGTACGCCGTCTGCGCTCTCAAGGTCTCAGTCATTG  
TGGTCATTGGCCACAGCCGCTGCGGTGGTATCAAGGCCCTCCTCTCCATGGAGGAAGGTGCACCCGACAACCTCCACTTCGTTGAGGA  
CTGGGTGAGGATCGGCTTACCCGCCAAGAAGAAGGTGCAGACTGAGTGCAAGGCATTGCCGTTTCGATGCACAGTGCAGTGTCTTGA  
AAAGGAGGCCGTCAATGTGTCCCTTGACAACCTAAAGACTTACCCATTTCGTCAAAGAAGGAGTGGAATGGGAGCCTCAAGCTGGT  
CGGCGCCCACTACGACTTCGTCAACGGCAAGTTCGAGACATGGGACGCTCCAACCTCCTCCTTCCAAGGCTGTGGATGCTGTTGCA  
CGCTTGAAGACTGGGTTCCAAAACCTCAAGATCGATGTCTACGACAAGAAGCCAGAATTATTCGAGCCACTTAAGGAGGGCCAGGCA  
CCCACGTTTCATGGTGTTCGCTTGTGCGGACTCCCGGTGCTGCCCTTCGGTAACCTCCGCCTGCAACCCGGTGAGGCCTTACCATACG  
CAACATTGCCAGCATGGTCGGACCTACGACAAGACCAAGTACACCGGCATTGGGTCTGCCATCGAGTATGCCGTCTGCGCGCTCAAG  
GTCTCATGCATCGTGGTCATTGGCCACAGCCGTTGTGGTGGTATCAGGGCCCTCC
